# Supplementary material
Source: PubMed Central journal article supplement (PMC6341491)
Supplement: NIHMS1005449-supplement-1.pdf [file NIHMS1005449-supplement-1.pdf]

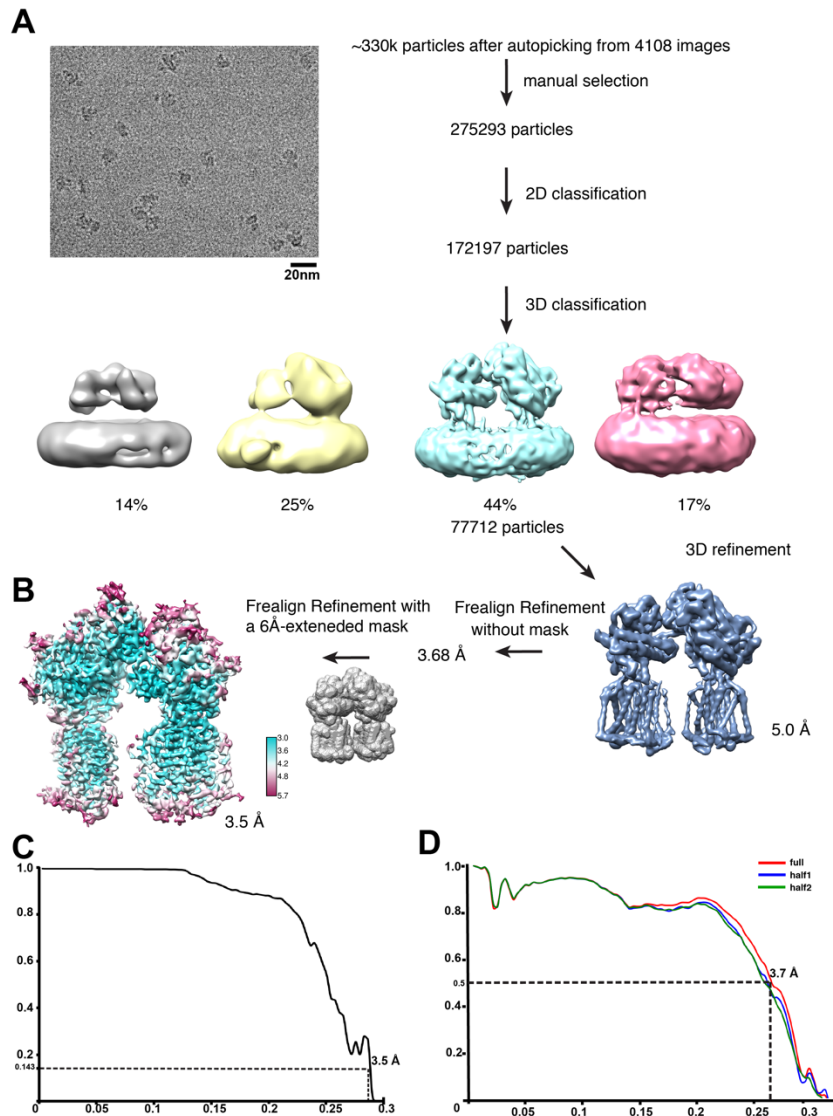

**Fig. S1 Data processing and Model quality assessment.**

(A) The data processing work-flow for the 2:1 PTCH1\*–SHH-N complex with a representative electron micrograph at  $-2.0 \mu\text{m}$  defocus (left top). (B) Density maps of structure colored by local resolution estimation using blocres. (C) Fourier shell correlation (FSC) curve of the structure with FSC as a function of resolution using Frealign output. (D) The FSC curves calculated between the refined structure and the half map used for refinement, the other half map and the full map.

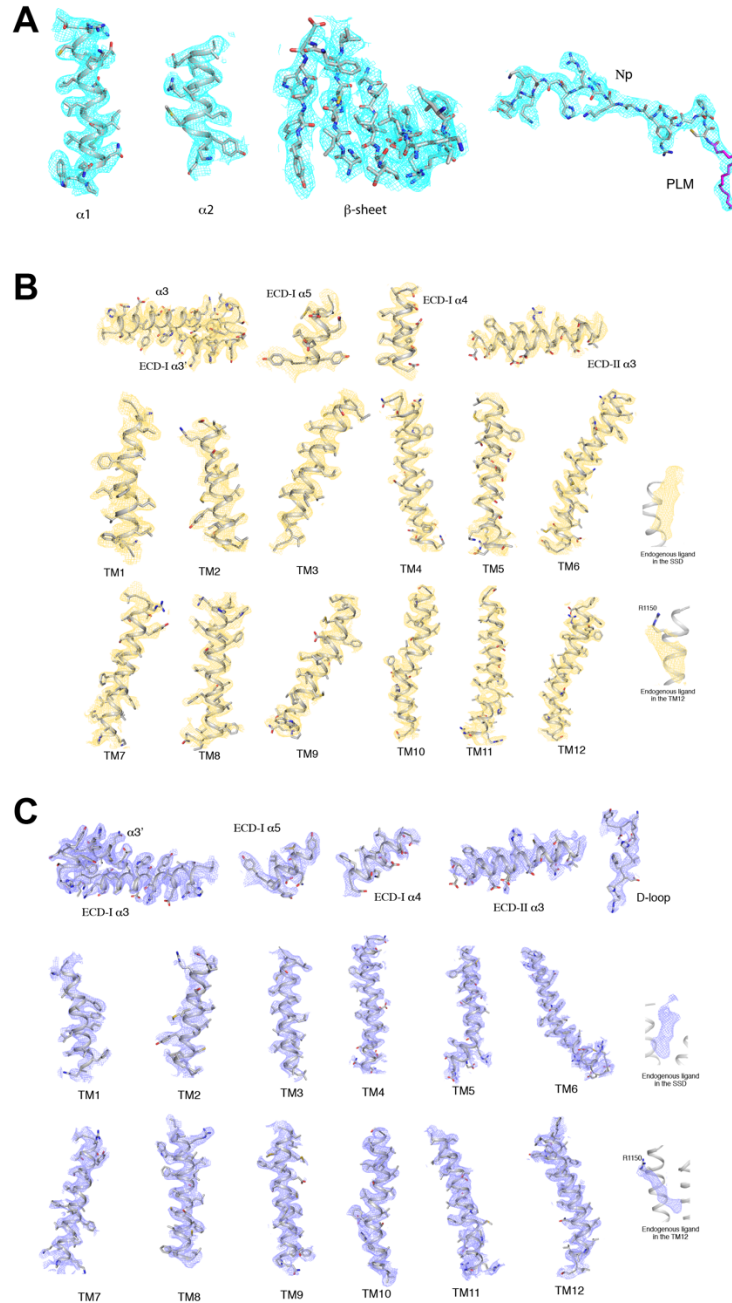

**Fig. S2 An atomic resolution model of SHH-N and PTCH1s in the complex.**

(A) EM density map and model of SHH-N are shown for major structural elements, the N-terminal peptide (Np) and the palmitate moiety (PLM). (B) PTCH1-A; (C) PTCH1-B. EM density map and model are shown for all 12 TMs, major structural elements in the ECDs, and two endogenous molecules (only map).

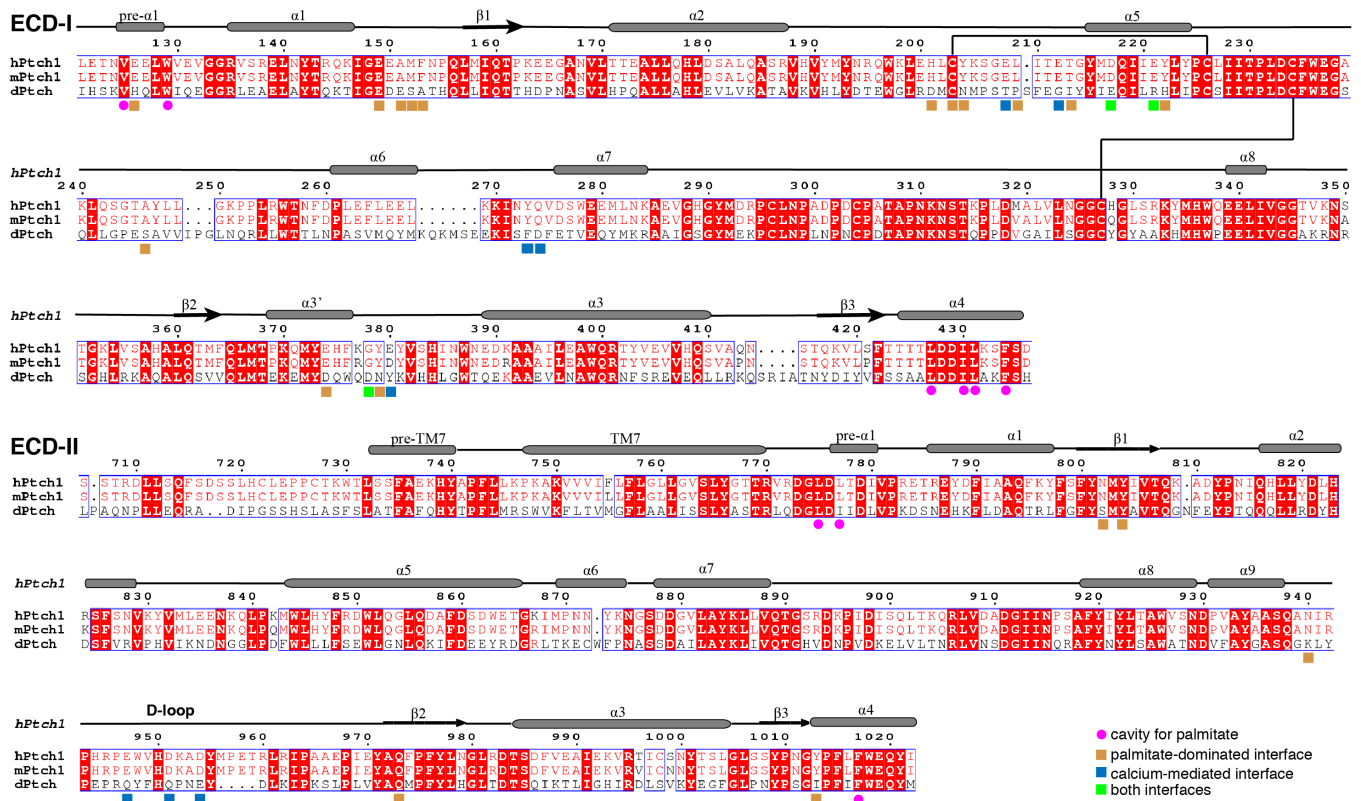

**Fig. S3 Sequence alignment of the ECDs of human PTCH1, mouse PTCH1, and *Drosophila* PTCH.**

The residue numbers of hPTCH1 are indicated above the protein sequence. The secondary structures of ECDs are labeled and the specific residues for binding the SHH-N have been indicated by the circles or squares.

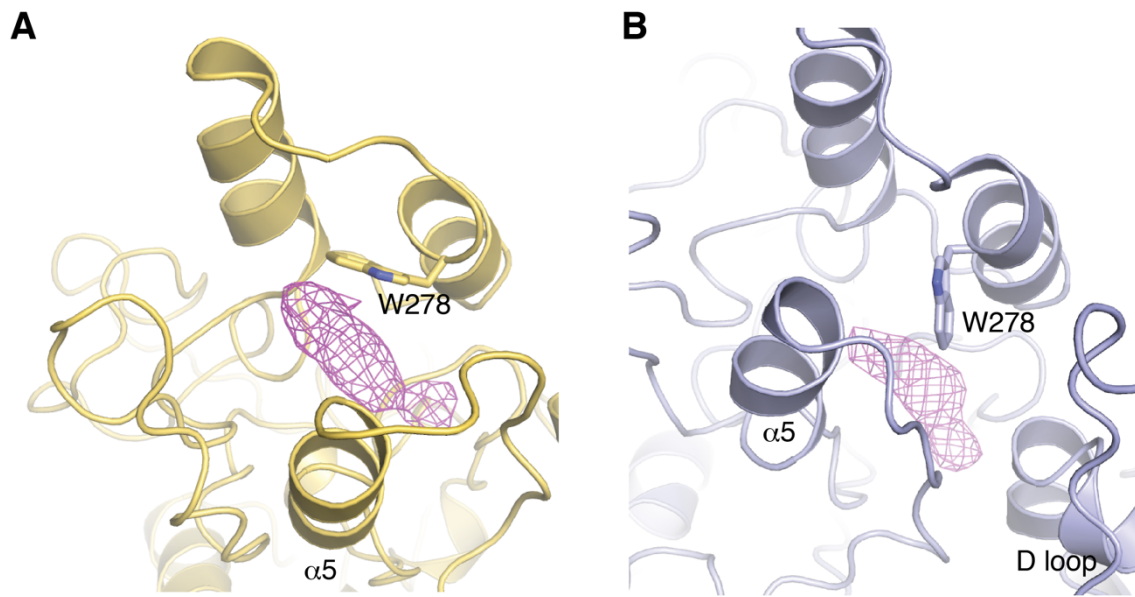

**Fig. S4 The rod-like density in ECD-I.**

**(A)** PTCH1-A; **(B)** PTCH1-B. The unidentified molecule is shown as mesh at 5 $\sigma$  level.

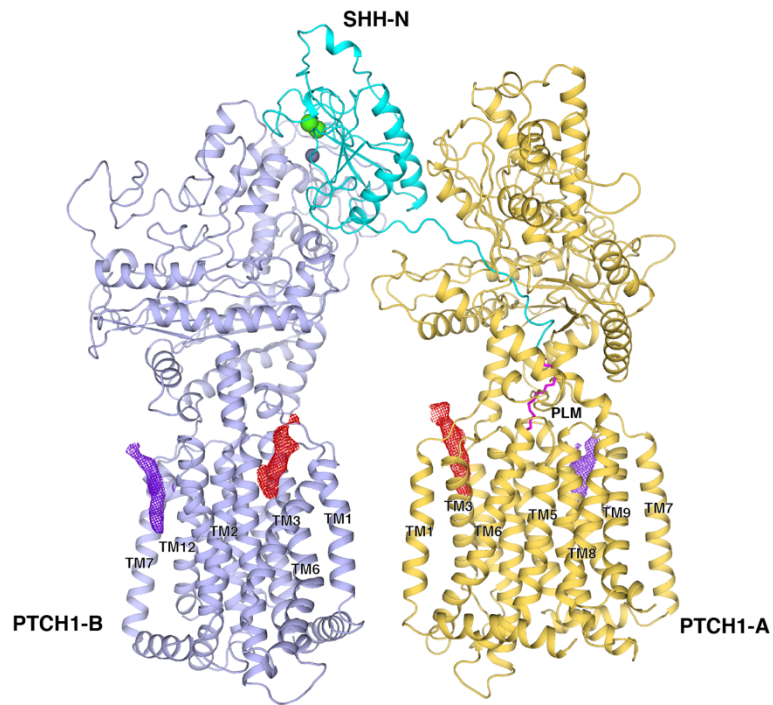

**Fig. S5 The sterol-like densities in the transmembrane domains shown as mesh at  $2.5\sigma$  level.**

Sterol-like densities in the SSDs and near TMs12 are colored in red and purple, respectively.

**Table S1 Statistics of data collection and refinement.**

|                                        | PTCH1*-SHH-N      |
|----------------------------------------|-------------------|
| <b>Data Collection</b>                 |                   |
| Microscope                             | Titan Krios (FEL) |
| Voltage (kV)                           | 300               |
| Detector                               | K2 Summit (Gatan) |
| Pixel size (Å)                         | 1.0               |
| Defocus range (µm)                     | -1.2 to -2.2      |
| Movies                                 | 4108              |
| Frames/movie                           | 50                |
| Dose rate (electrons/pixel/s)          | 8                 |
| Total dose (electrons/Å <sup>2</sup> ) | 80                |
| Number of particle                     | 275,293           |
| <b>Model composition</b>               |                   |
| Non-hydrogen atoms                     | 16671             |
| Protein residues                       | 2120              |
| Ligand                                 | 4                 |
| <b>Refinement</b>                      |                   |
| Number of particle for refinement      | 77,712            |
| Resolution (Å)                         | 3.5               |
| RMS deviations                         |                   |
| Bond lengths (Å)                       | 0.0047            |
| Bond angles (°)                        | 1.1589            |
| Ramachandran plot (%)                  |                   |
| Favored                                | 90.3              |
| Allowed                                | 9.7               |
| Disallowed                             | 0.0               |
| <b>Clashscore, all atoms</b>           | 5.53              |
| <b>Molprobit score</b>                 | 2.04              |
